# Supplementary material for: Honeycomb-like MnO2/Biochar Catalyst Fabricated by High-Energy Electron Beam Irradiation for Degradation of Antibiotics in Swine Urine
Source: MDPI journal article supplement (doi:10.3390/biomimetics8010032), 2023-01-13
Supplement: s1 [file s1]

## Supporting Information

### Honeycomb-like MnO<sub>2</sub>/biochar catalyst fabricated by high-energy electron beam (HEEB) irradiation for degradation of antibiotics in swine urine

Huan Ma <sup>1</sup>, Zhi Wang <sup>1</sup>, Ling Qian <sup>1</sup>, Gaorui Jin <sup>1</sup>, Pengqi Yang <sup>2,4</sup>, Dongfang Wang <sup>3</sup>, Shengkai Xu <sup>1</sup>, Dongqing Cai <sup>3,\*</sup>, Zhengyan Wu <sup>2,4,\*</sup>, Xin Zhang <sup>1,\*</sup>

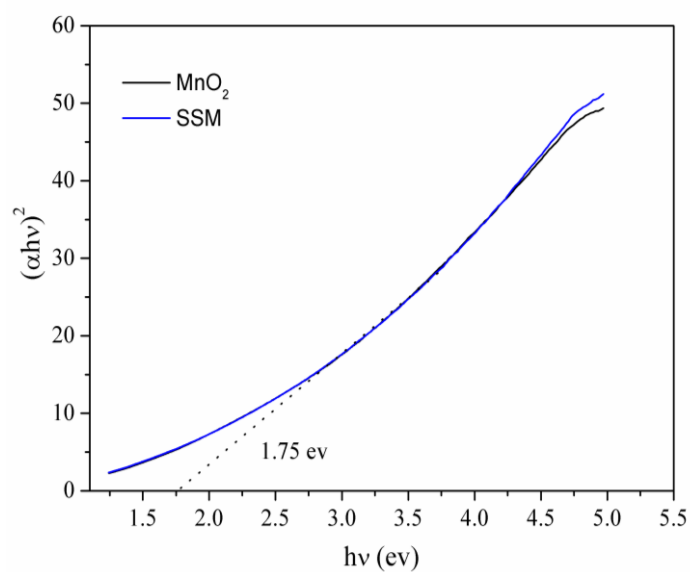

Figure S1. Plots of  $(\alpha h\nu)^n$  versus  $h\nu$  for biochar, MnO<sub>2</sub> and SSM

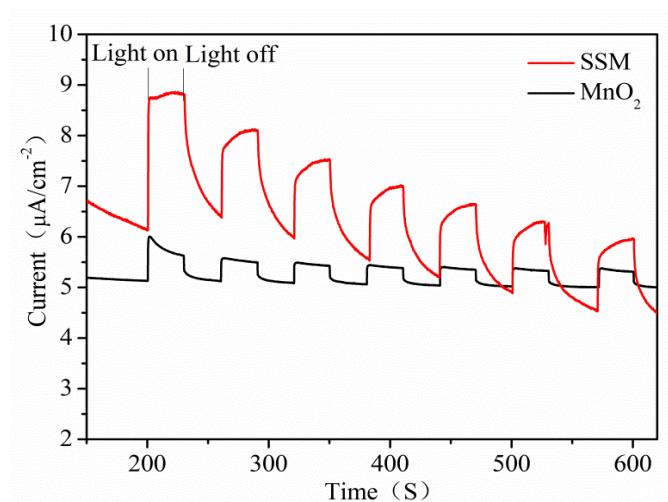

Figure S2. Photocurrent response spectra of pure MnO<sub>2</sub> and SSM

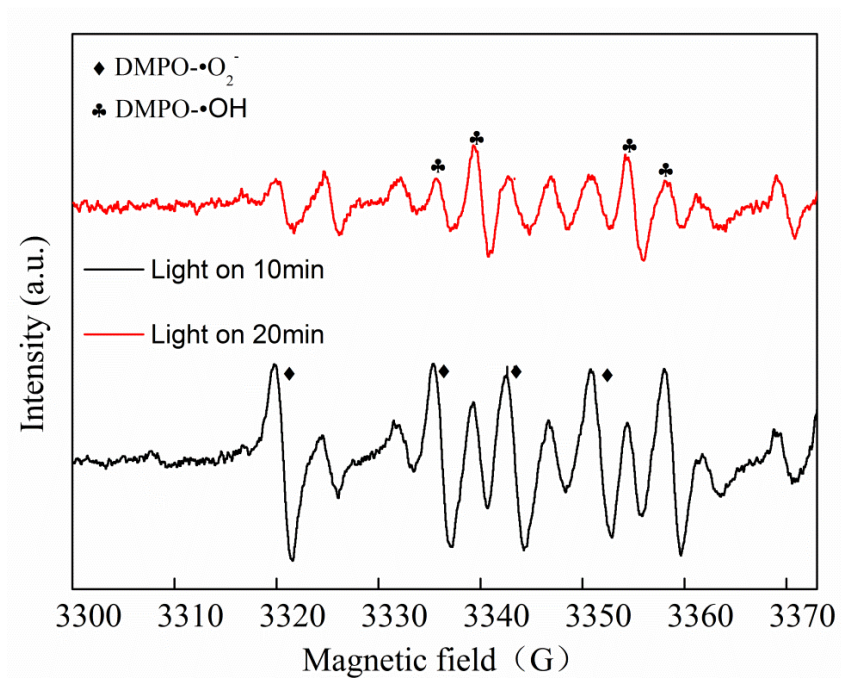

Figure S3. DMPO spin-trapping EPR spectra of SSM

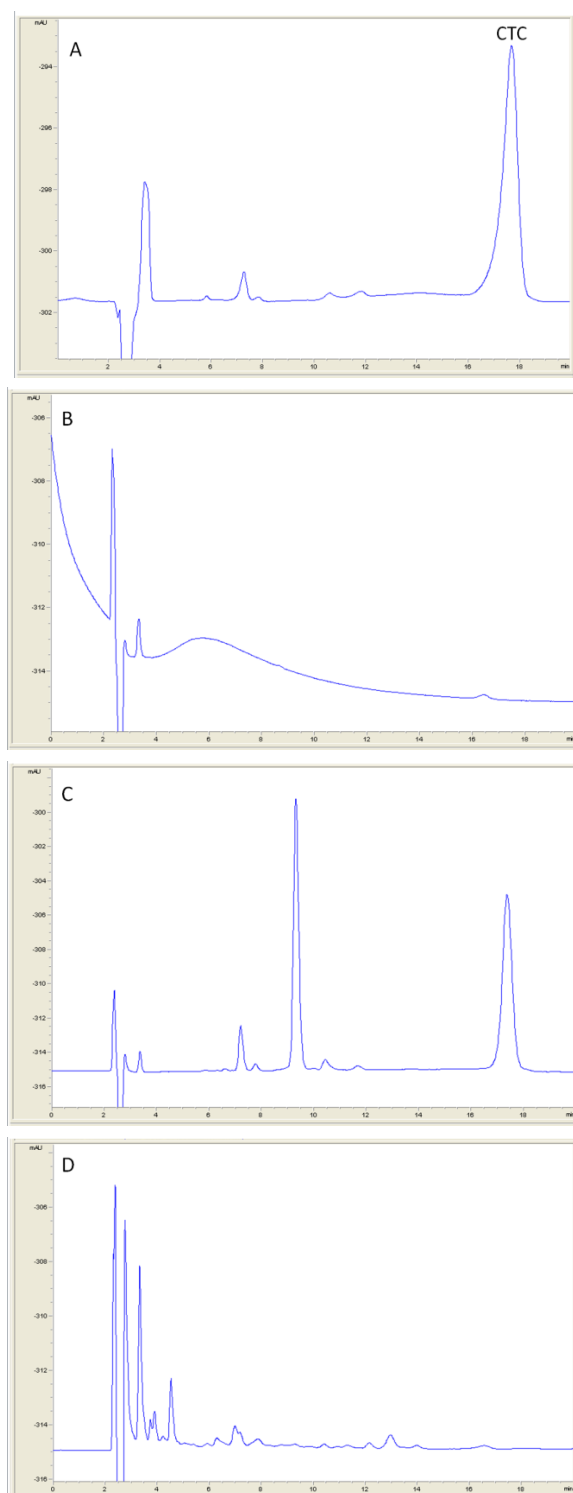

Figure S4. HPLC chromatogram of CTC samples: (A) CTC standard; (B) SSM in aqueous solution ; (C) the sample of CTC-SSM system at 2 h under darkness; (D) the sample of CTC-SSM system at 2 h under sunlight.

HPLC conditions: HPLC instrument (Agilent 1220, USA) equipped with a UV-vis detector. A VF-5ms C18 column (250 × 4.6 mm i.d. stainless steel, 5 μm particles, Agilent Technologies, USA) was used to separate the CTC samples with an isocratic

mobile phase (0.01 M oxalic acid solution:acetonitrile:methanol = 73:17:10, v/v/v) at a flow rate of 0.9 mL/min at 25°C. The UV wavelength was set at 270 nm, 0.1 AUFS.

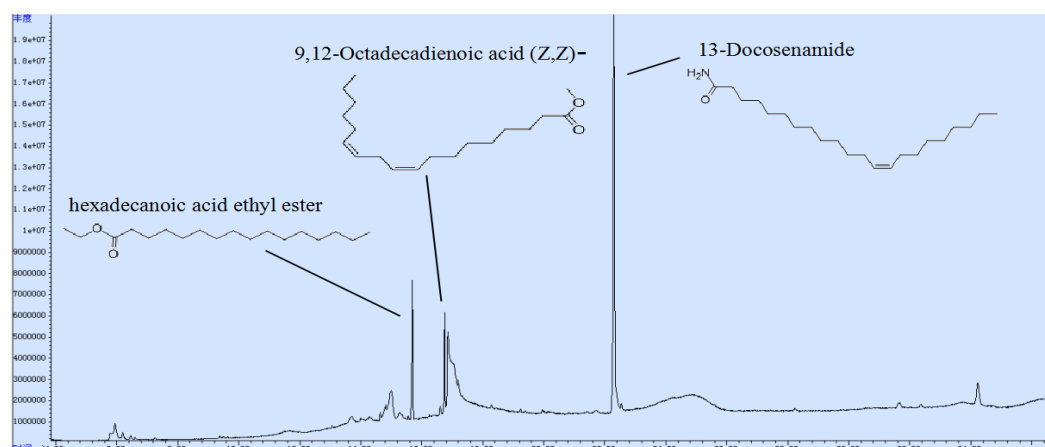

Figure S5. GC-MS identification of the photocatalytic degradation products of CTC by SSM after sunlight irradiation for 2 h.

GC-MS conditions: GC-MS instrument (Agilent 7890A-5979C, USA) with a VF-5ms capillary column (60 m  $\times$  0.25 mm, Agilent, USA). The column temperature gradient was programmed from 50 °C (hold for 2.25 min) to 280 °C at 20°C/min and to 290 °C at 0.5 °C/min and kept until 35.25 min. The injector volume was 1  $\mu$ L. Helium was used as a carrier gas with a flow rate of 1 mL/min.
